# Supplementary material for: An Objective Approach to Determining the Weight Ranges of Prey Preferred by and Accessible to the Five Large African Carnivores
Source: PLoS One. 2014 Jul 2;9(7):e101054. doi: 10.1371/journal.pone.0101054 (PMC4079238; doi:10.1371/journal.pone.0101054)
Supplement: Table S2 — Prey species masses, mass-ranks and mean Jacob’s Index (J.I.) values used in segmented model analyses. (XLSX) [file pone.0101054.s002.xlsx]

## Sheet: Appendix 2
		Cheetah			Leopard			Lion			Spotted Hyaena			Wild dog
Prey Species	Mass (kg)	Mass Rank	J.I.	n	Mass Rank	J.I.	n	Mass Rank	J.I.	n	Mass Rank	J.I.	n	Mass Rank	J.I.	n
Francolins Francolinus sp.	0.5				1	-0.964752	2
Ground squirrel Xerus inauris	0.5				2	-0.186987	2
Mongoose species	0.5	1	-1	2	3	-0.421996	5
Guineafowl Numida meleagris	0.8				4	-0.937508	3
Genet Genetta sp.	1				5	0.0504057	5
Hare Lepus sp.	1.5	2	-1	2	6	-0.355347	7
Springhare Pedetes capensis	2.5	3	-1	2	7	-1	2
Bat-eared fox Otocyon megalotis	3	4	-0.63	2	8	0.016418	4
Duiker (Blue) Cephalophus monticola	3	5	-1	3										1	-1	3
Vervet monkey Cercopithecus aethiops	3.5	6	-1	3	9	-0.0155361	5	1	-1	4				2	-1	2
Baboon (Yellow) Papio cynocephalus	5													3	-1	8
Jackal (Black-backed) Canis mesomelas	6				10	0.283784	5
Civet Civetticus civetta	7				11	0.839056	2
Grysbok (Cape) Raphicerus melanotis	7	7	-1	3										4	-1	3
Grysbuck (Sharpe's) Raphicerus sharpei	7	8	-0.83	5	12	-0.504403	5	2	-0.96	4	1	-0.12	2	5	-0.73	5
Honey badger Mellivora capensis	8				13	-1	4
Steenbok Raphicerus campestris	8	9	-0.02	8	14	-0.180465	12	3	-0.86	4	2	-0.56	4	6	-0.34	5
Duiker (Red) Cephalophus natalensis	10										3	-0.7	2
Klipspringer Oreotragus oreotragus	10	10	-1	6	15	-0.204243	8	4	-0.96	4	4	-0.84	2	7	-0.97	6
Porcupine Hystrix africaeaustralis	10	11	-1	2	16	-0.378196	5
Baboon (Chacma) Papio cynocephalus	12	12	-1	8	17	-0.462824	9	5	-0.89	5	5	-0.99	2
Oribi Ourebia ourebi	14	13	-0.85	4	18	-0.769855	4	6	-0.72	2				8	-0.88	4
Gazelle (Thomson's)	15	14	0.5	8	19	0.309553	5	7	-0.62	9	6	-0.46	4	9	0.68	6
Duiker (Common) Sylvicapra grimmia	16	15	0.18	9	20	0.323885	15	8	-0.83	7	7	-0.45	7	10	0.15	8
Bushbuck Tragelaphus scriptus	22.5	16	-0.1	13	21	0.464994	13	9	-0.53	9	8	0.1	4	11	0.36	14
Reedbuck (Mountain) Redunca fulvorufula	23	17	-0.39	8	22	-0.428972	6							12	-0.77	7
Springbok Antidorcas marsupialis	26	18	0.41	8	23	-0.531091	4	10	-0.59	4	9	-0.81	3	13	-0.68	8
Impala Aepyceros melampus	30	19	0.11	27	24	0.454893	24	11	-0.73	34	10	-0.09	13	14	0.25	19
Reedbuck (Common) Redunca aruninum	32	20	0.12	11	25	0.1019	11	12	-0.57	17	11	-0.52	4	15	-0.41	10
Gazelle (Grant's) Gazella granti	38	21	0.59	7	26	0.0990933	3	13	-0.56	8	12	-0.19	2	16	-0.06	5
Aardvark Orycteropus afer	40				27	0.148976	2
Bontebok Damaliscus dorcas dorcas	45	22	-1	2										17	-1	3
Warthog Phacochoerus africanus	45	23	-0.41	26	28	-0.223245	22	14	0.11	39	13	-0.2	14	18	-0.52	20
Bushpig Potamochoerus larvatus	46	24	-1	9	29	-0.746839	6	15	0.11	2	14	-0.12	2	19	-1	8
Kob Kobus kob	47							16	-0.31	4
Nyala Tragelaphus angasi	47	25	-0.58	7	30	-0.368476	7	17	-0.32	7	15	-0.33	3	20	-0.48	10
Blesbok Damaliscus dorcas phillipsi	52.5	26	0.62	6	31	-0.15836	4							21	-0.55	7
Lechwe Kobus leche	60	27	-1	3										22	-1	3
Ostrich Struthio camelus	70	28	-0.61	16	32	-0.644536	10	18	-0.55	11	16	-0.41	2	23	-1	13
Tsessebe/Topi Damaliscus lunatus	90	29	-0.65	11	33	-0.594872	9	19	0.01	13	17	0.01	6	24	-0.69	12
Hartebeest (Red) Alcephalus busephalus	95	30	-0.18	19	34	-0.630927	13	20	0.02	17	18	-0.36	8	25	-0.56	14
Wildebeest (Black) Connochaetes gnou	100	31	-1	3										26	-1	3
Kudu Tragelaphus strepsiceros	135	32	-0.04	19	35	-0.284634	23	21	0.13	25	19	0.11	11	27	0.35	18
Wildebeest (Blue) Connochaetes taurinus	136	33	-0.63	26	36	-0.764692	26	22	0.27	38	20	0.02	15	28	-0.7	24
Gemsbok Oryx gazelle	158	34	-0.66	10	37	-0.25324	9	23	0.7	4	21	0.62	3	29	-1	9
Zebra (Plains) Equus burchelli	175	35	-0.69	28	38	-0.776113	25	24	0.16	40	22	-0.44	16	30	-0.88	24
Zebra (Mountain) Equus zebra	178.5	36	-1	3										31	-1	3
Sable Hippotragus niger	180	37	-0.61	7	39	-0.82	7	25	-0.05	12	23	-1	2	32	-0.63	9
Waterbuck Kobus ellipsiprymnus	188	38	-0.13	25	40	-0.353877	20	26	0.18	30	24	-0.02	10	33	-0.35	21
Roan Hippotragus equines	220	39	-0.79	5	41	-0.508503	7	27	0.15	16	25	-0.56	3	34	-1	5
Eland Tragelaphus oryx	345	40	-0.84	20	42	-0.63728	13	28	0.18	24	26	-0.34	6	35	-0.71	16
Buffalo Syncerus c. caffer	432	41	-0.98	22	43	-0.843381	18	29	0.32	30	27	-0.39	11	36	-0.98	20
Giraffe Giraffa camelopardalis	550	42	-0.95	22	44	-0.960515	20	30	0.24	24	28	-0.59	9	37	-1	15
Hippopotamus Hippopotamus amphibius	750	43	-1	9	45	-1	5	31	-0.45	4	29	0.28	2	38	-1	9
Rhinoceros (Black) Diceros bicornis	800	44	-1	8	46	-1	3	32	-1	2				39	-1	7
Rhinoceros (White) Ceratotherium simum	1400	45	-1	5	47	-1	6	33	-1	2				40	-1	7
Elephant Loxodonta africana	1600	46	-1	9	48	-1	7	34	-0.87	4	30	-1	3	41	-1	9
